# Supplementary material for: Synthesis of highly fluorescent P,O-g-C3N4nanodots for the label-free detection of Cu2+and acetylcholinesterase activity
Source: Royal Society of Chemistry journal article supplement (doi:10.1039/c5tc02584b), 2015-01-01
Supplement: c5tc02584b1.pdf [file c5tc02584b1.pdf]

## Supporting information for

# Synthesis of highly fluorescent P, O-g-C<sub>3</sub>N<sub>4</sub> nanodots for the label-free detection of Cu<sup>2+</sup> and acetylcholinesterase activity

Mingcong Rong<sup>a</sup>, Xinhong Song<sup>a</sup>, Tingting Zhao<sup>c</sup>, Qihong Yao<sup>c</sup>, Yiru Wang<sup>a</sup>, Xi Chen<sup>a,b\*</sup>

<sup>a</sup>Department of Chemistry and the MOE Key Laboratory of Spectrochemical Analysis & Instrumentation, College of Chemistry and Chemical Engineering, Xiamen University, Xiamen 361005, China

<sup>b</sup>State Key Laboratory of Marine Environmental Science, Xiamen University, Xiamen, 361005, China

<sup>c</sup>Xiamen Huaxia University, Xiamen, 361005, China

### Fluorescence quantum yield (QY) measurements

The relative QY of phosphorus, oxygen-doped graphitic carbon nitride nanodots (P, O-g-C<sub>3</sub>N<sub>4</sub> nanodots) was determined with reference to quinine sulfate (QY=54% in 0.1 M H<sub>2</sub>SO<sub>4</sub>).<sup>1</sup> The same excitation and emission slit band widths were applied for both samples, and the QY for the P, O-g-C<sub>3</sub>N<sub>4</sub> nanodots was calculated using the following formula:

$$QY = QY_R \cdot \frac{I}{I_R} \cdot \frac{A_R}{A} \cdot \frac{n^2}{n_R^2}$$

where the subscript “R” refers to the referenced fluorescence dye of known QY; *n* represents the refractive index (1.33 for both water and 0.1 M H<sub>2</sub>SO<sub>4</sub>); and *A* is the absorption at the excitation wavelength; and *I* is the integrated intensity (area) of the testing sample. To avoid the self-absorption effect, absorption in a 10 mm absorption cell was maintained below 0.1 at the excitation wavelength (350 nm for quinine sulfate). The QY of the P, O-g-C<sub>3</sub>N<sub>4</sub> nanodots was measured to be 90.2% using this equation.

---

\* Corresponding author. Tel: +86 592 2184530; Fax: +86 592 2184530; E-mail address: [xichen@xmu.edu.cn](mailto:xichen@xmu.edu.cn)

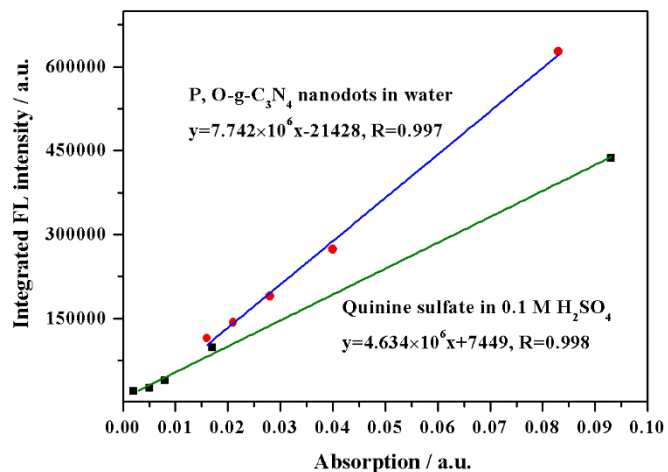

Figure S1. Plot of integrated FL intensity of the P, O-g-C<sub>3</sub>N<sub>4</sub> nanodots and quinine sulfate as a function of optical absorption at 350 nm.

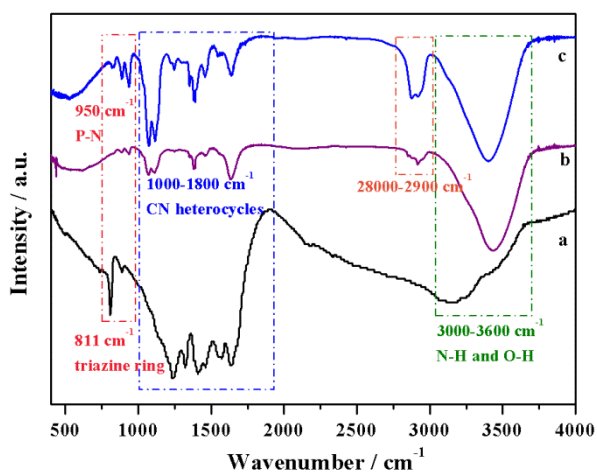

Figure S2. FT-IR spectrum of (a) the bulk P-g-C<sub>3</sub>N<sub>4</sub>, (b) the P, O-g-C<sub>3</sub>N<sub>4</sub> nanodots and (c) P, O-g-C<sub>3</sub>N<sub>4</sub> nanodots with 5 μM Cu<sup>2+</sup>.

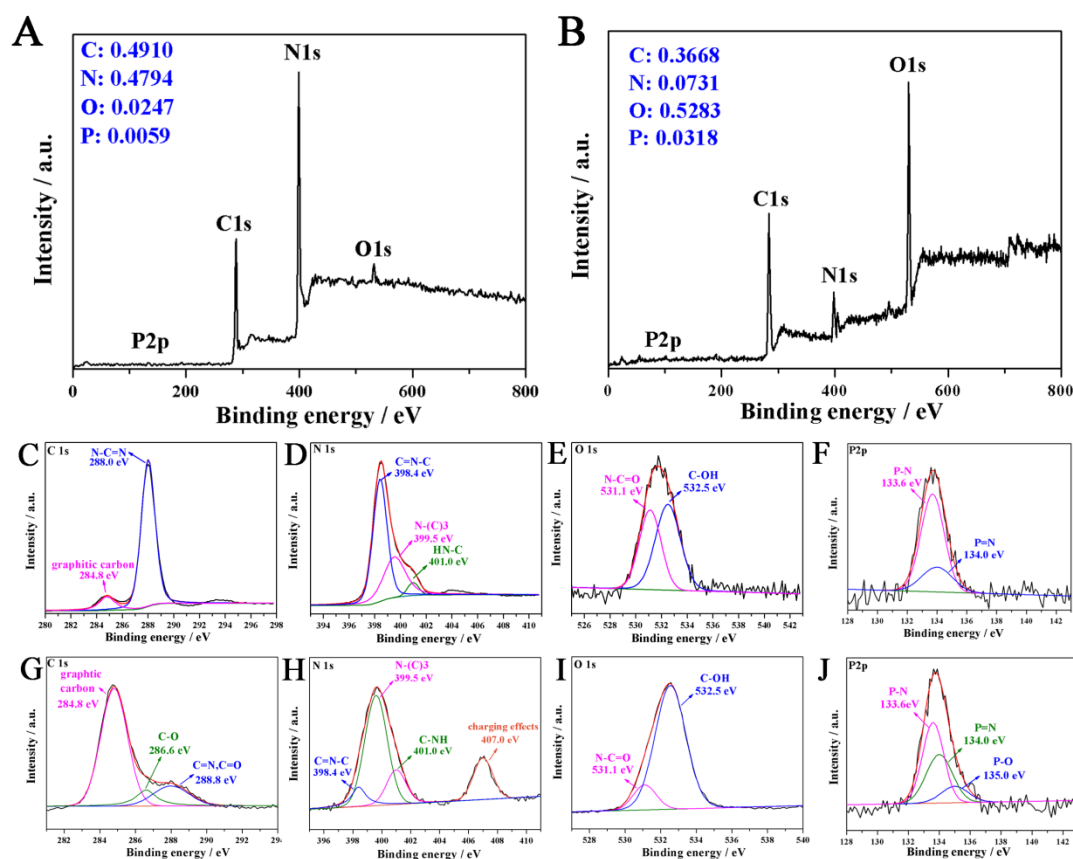

Figure S3. (A) XPS spectrum of the bulk P-g-C<sub>3</sub>N<sub>4</sub>. (B) XPS spectrum of the P, O-g-C<sub>3</sub>N<sub>4</sub> nanodots. (C) C1s spectrum of the bulk P-g-C<sub>3</sub>N<sub>4</sub>. (D) N1s spectrum of the bulk P-g-C<sub>3</sub>N<sub>4</sub>. (E) O1s spectrum of the bulk P-g-C<sub>3</sub>N<sub>4</sub>. (F) P2p spectrum of the bulk P-g-C<sub>3</sub>N<sub>4</sub>. (G) C1s spectrum of the P, O-g-C<sub>3</sub>N<sub>4</sub> nanodots. (H) N1s spectrum of the P, O-g-C<sub>3</sub>N<sub>4</sub> nanodots. (I) O1s spectrum of the P, O-g-C<sub>3</sub>N<sub>4</sub> nanodots. (J) P2p spectrum of the P, O-g-C<sub>3</sub>N<sub>4</sub> nanodots.

Table S1. The elemental analysis results of the bulk P-g-C<sub>3</sub>N<sub>4</sub> and P, O-g-C<sub>3</sub>N<sub>4</sub> nanodots

| Materials                                     | N (%) | C (%) | H (%) | Other elements (%) | N/C ratio |
|-----------------------------------------------|-------|-------|-------|--------------------|-----------|
| Bulk P-g-C <sub>3</sub> N <sub>4</sub>        | 57.80 | 31.93 | 1.971 | 8.299              | 1.55      |
| P, O-g-C <sub>3</sub> N <sub>4</sub> nanodots | 22.04 | 15.09 | 4.465 | 58.405             | 1.46      |

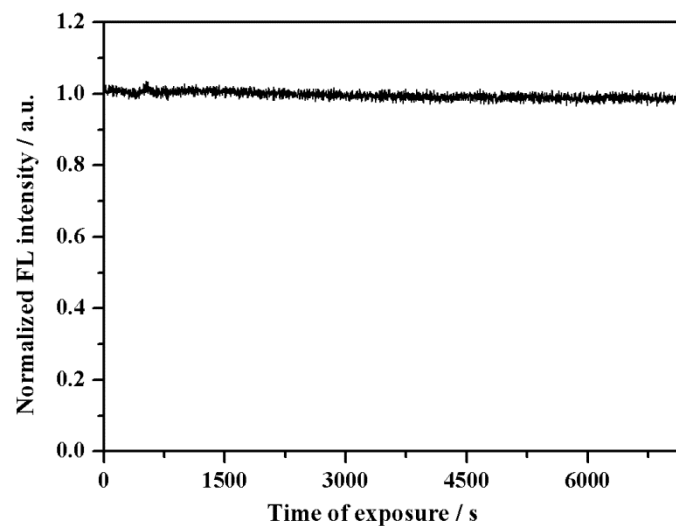

Figure S4. The photostability of the P, O-g-C<sub>3</sub>N<sub>4</sub> nanodots (with excitation and emission slit: 10 nm, 10 nm,  $\lambda_{\text{ex}} = 350$  nm).

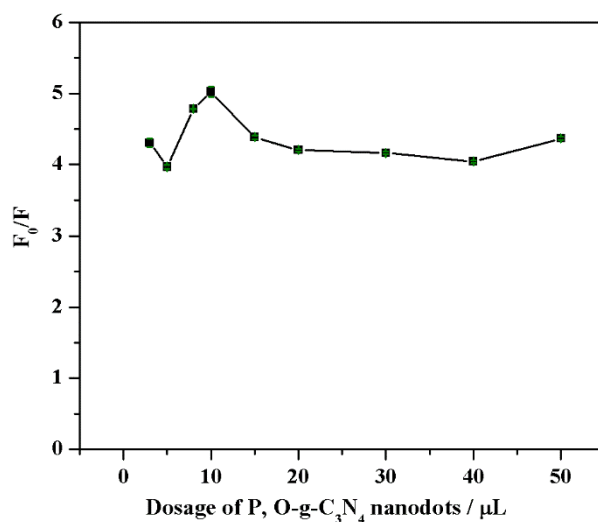

Figure S5. Relationship between the concentration of the P, O-g-C<sub>3</sub>N<sub>4</sub> nanodots and the fluorescence intensity.  $F_0$  and  $F$  represent the fluorescence of the P, O-g-C<sub>3</sub>N<sub>4</sub> nanodots in the absence and presence of 3  $\mu\text{M}$  Cu<sup>2+</sup>.

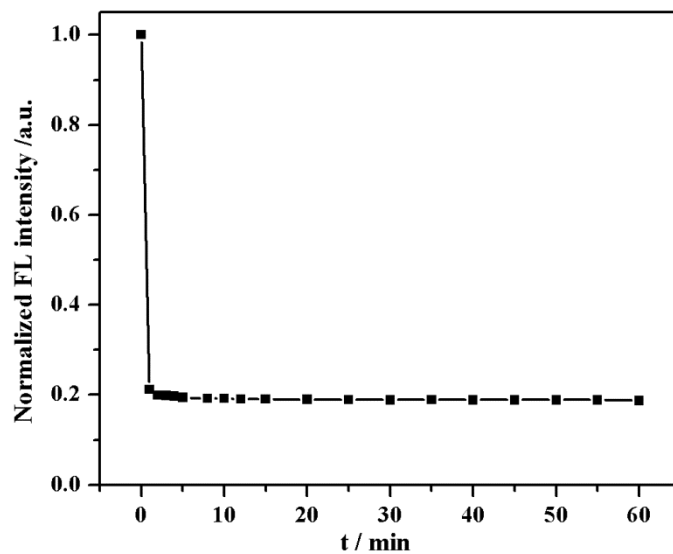

Figure S6. Kinetic characteristic of the fluorescence response of the P, O-g-C<sub>3</sub>N<sub>4</sub> nanodots to 3  $\mu\text{M}$  Cu<sup>2+</sup> in 10 mM borate buffer (pH 7.0).

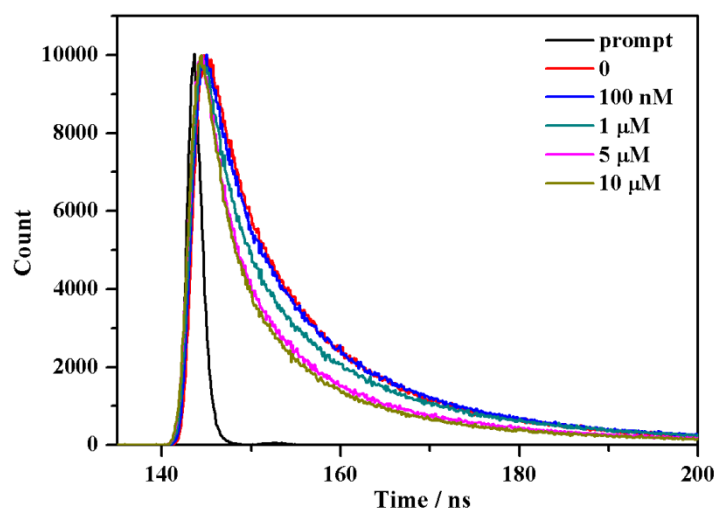

| Concentration of Cu <sup>2+</sup> | B <sub>1</sub> /% | $\tau_1$ /ns | B <sub>2</sub> /% | $\tau_2$ /ns | B <sub>3</sub> /% | $\tau_3$ /ns | $\tau_{\text{avg}}$ /ns | $\chi^2$ |
|-----------------------------------|-------------------|--------------|-------------------|--------------|-------------------|--------------|-------------------------|----------|
| 0                                 | 6.30              | 1.087        | 55.45             | 4.722        | 38.24             | 11.79        | 7.196                   | 1.15     |
| 0.1 $\mu\text{M}$                 | 6.02              | 1.068        | 56.86             | 4.683        | 37.12             | 11.89        | 7.139                   | 1.07     |
| 1 $\mu\text{M}$                   | 9.18              | 0.621        | 42.97             | 3.577        | 47.85             | 11.15        | 6.931                   | 0.978    |
| 5 $\mu\text{M}$                   | 12.97             | 0.904        | 49.43             | 4.056        | 37.60             | 12.38        | 6.775                   | 1.13     |
| 10 $\mu\text{M}$                  | 14.29             | 1.115        | 54.13             | 4.244        | 31.58             | 13.41        | 6.691                   | 1.09     |

Figure S7. Time-resolved decay of the P, O-g-C<sub>3</sub>N<sub>4</sub> nanodots with different concentrations of Cu<sup>2+</sup> in 10 mM borate buffer (pH 7.0) and the corresponding lifetime values.

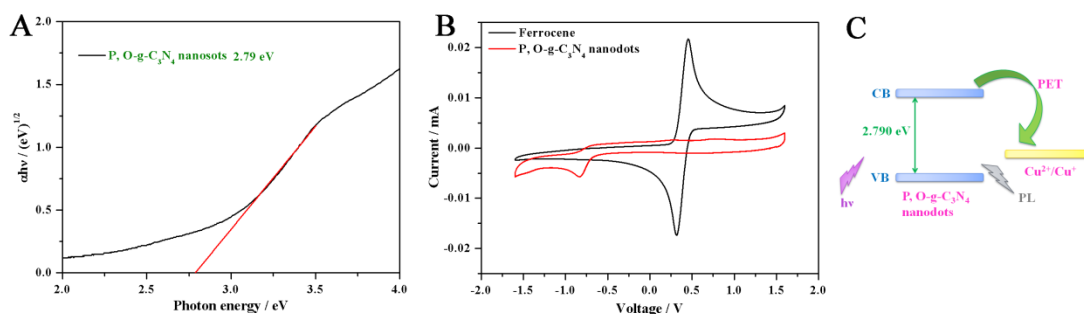

Figure S8. (A) The plots of the  $(\alpha h\nu)^{1/2}$  versus photon energy. (B) Cyclic voltammogram (CV) of a glass carbon electrode (GCE) modified with the P, O-g-C<sub>3</sub>N<sub>4</sub> nanodots in a de-oxygenized acetonitrile solution containing 0.1 M tetra-n-butylammonium hexafluorophosphate. (C) Schematic illustration of the PET mechanism between the P, O-g-C<sub>3</sub>N<sub>4</sub> nanodots and Cu<sup>2+</sup>.

The band gap of the P, O-g-C<sub>3</sub>N<sub>4</sub> nanodots was determined by plotting the  $(\alpha h\nu)^{1/2}$  versus photon energy from the absorption spectrum.  $\alpha$ ,  $h$  and  $\nu$  are absorption coefficient, plank constant and light frequency. The extrapolating the linear region to zero on an abscissas axis is the band gap of the P, O-g-C<sub>3</sub>N<sub>4</sub> nanodots ( $\Delta E = 2.790$  eV).<sup>2</sup>

The P, O-g-C<sub>3</sub>N<sub>4</sub> nanodots stock solution were mixed with 5% Nafion and then drop-casted onto the GCE. The CV were carried out in three-electrode system, with GCE as the working electrode (WE), platinum electrode as the counter electrode (CE) and saturated calomel electrode (SCE) as the reference electrode (RE). The electrode potential of SCE is 0.241 V versus normal hydrogen electrode (NHE). And the electrode potential of NHE is 4.5 V lower than the vacuum electron standard electrode potential. The valence band (VB) and conduction band (CB) were indirectly detected by HOMO and LUMO of the P, O-g-C<sub>3</sub>N<sub>4</sub> nanodots by the following formulas.<sup>3</sup>  $E_{\text{ox}}^{\text{onset}}$  and  $E_{\text{red}}^{\text{onset}}$  are the onset oxidation and reduction potential of the P, O-g-C<sub>3</sub>N<sub>4</sub> nanodots, the  $E_{\text{red}}^{\text{onset}}$  is -0.686 V according to the above figure, but the  $E_{\text{ox}}^{\text{onset}}$  is not obvious in the CV determination.  $E_{\text{ferrocene}}^{1/2}$  is the average between the oxidation and reduction potential of ferrocene (measured as  $(0.464 + 0.329) / 2$  V = 0.397 V)  
 $\text{HOMO} = - [ E_{\text{ox}}^{\text{onset}} - E_{\text{ferrocene}}^{1/2} + 4.5 + 0.241 ]$  eV  
 $\text{LUMO} = - [ E_{\text{red}}^{\text{onset}} - E_{\text{ferrocene}}^{1/2} + 4.5 + 0.241 ]$  eV  
 So, the LUMO =  $-[-0.686 - 0.397 + 4.5 + 0.241]$  eV = -3.658 eV (versus the vacuum electron standard electrode potential), the corresponding VB is 0.842 V (versus the NHE)

$$\Delta E = 2.790 \text{ eV} = \text{LUMO} - \text{HOMO}$$

The HOMO =  $(-3.658 - 2.790)$ eV = -6.448 eV, and the corresponding CB is -1.948 V. The electrode potential of Cu<sup>2+</sup>/Cu<sup>+</sup> is 0.153 V (versus the NHE), so the PET mechanism may happen between the P, O-g-C<sub>3</sub>N<sub>4</sub> nanodots and Cu<sup>2+</sup>.

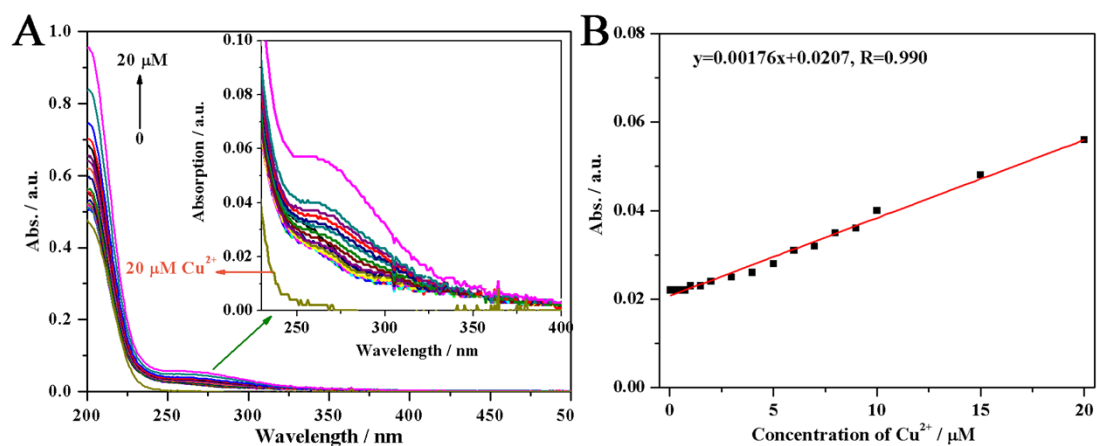

Figure S9. (A) UV-vis absorption of  $20 \mu\text{M}$   $\text{Cu}^{2+}$  aqueous and the P, O-g- $\text{C}_3\text{N}_4$  nanodots in the presence of increasing concentrations of  $\text{Cu}^{2+}$  in 10 mM borate buffer (pH 7.0). The inset figure presents the amplification figure of the UV-vis absorption from 230 to 400 nm. (B) The relationship between the absorbance of the P, O-g- $\text{C}_3\text{N}_4$  nanodots and the concentration of  $\text{Cu}^{2+}$ .

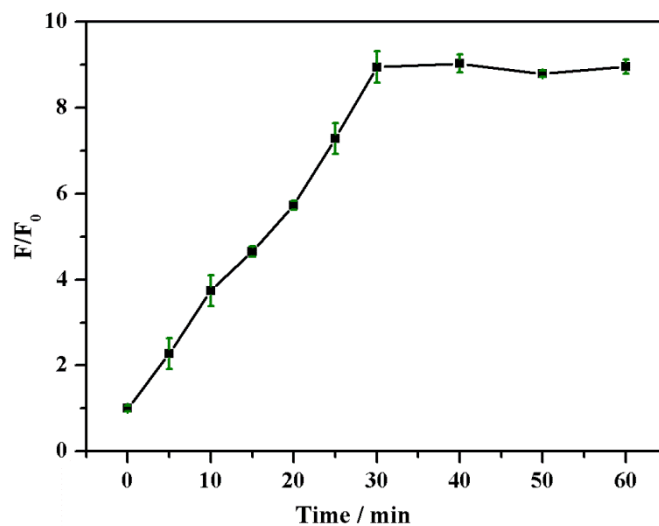

Figure S10. Fluorescence responses of the P, O-g- $\text{C}_3\text{N}_4$  nanodots- $\text{Cu}^{2+}$  to 10 mU/mL AChE at different incubation times.

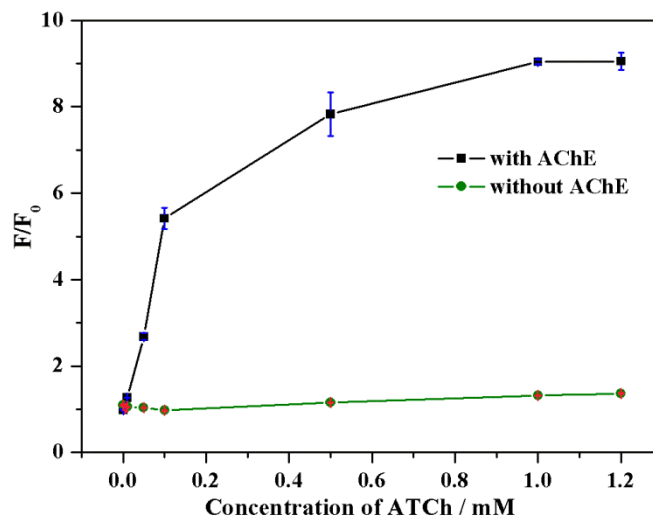

Figure S11. Fluorescence responses of the P, O-g-C<sub>3</sub>N<sub>4</sub> nanodots in the absence and presence of 10 mU/mL AChE at various concentrations of ATCh.

Table S2. The comparison of different fluorescence methods for the determination of Cu<sup>2+</sup>

| Methods                                               | Time consumption | Linear detection range | Detection limit | Reference |
|-------------------------------------------------------|------------------|------------------------|-----------------|-----------|
| g-C <sub>3</sub> N <sub>4</sub> nanosheets            | 10 min           | 0-10 nM (log)          | 0.5 nM          | 4         |
| g-C <sub>3</sub> N <sub>4</sub> nanodots              | 10 min           | /                      | 0.5 nM          | 5         |
| CdSe/ZnS QDs                                          | /                | 0-0.6 μM               | 0.14 nM         | 6         |
| Au-AgNCs                                              | 5 min            | 0.5-2.5 μM (log)       | 0.3 nM          | 7         |
| H <sub>39</sub> GFP fluorescent protein               | 5 min            | 0.05-2 μM              | 50 nM           | 8         |
| Carbon quantum dots                                   | 1 min            | 1-100 μM               | 10 nM           | 9         |
| Carbon quantum dots                                   | /                | 2-80 nM                | 1.8 nM          | 10        |
| Europium complex-functionalized magnetic nanoparticle | 5 min            | 0.1-1 nM               | 0.1 nM          | 11        |
| Iridium(III) complex                                  | /                | 0.1-80 μM              | 22.6 nM         | 12        |
| P, O-g-C <sub>3</sub> N <sub>4</sub> nanodots         | 5 min            | 0-1 μM                 | 2 nM            | This work |



Table S3. The comparison of different fluorescence methods for the determination of AChE activity

| Methods                                       | Incubation time consumption | Linear detection range | Detection limit | Reference |
|-----------------------------------------------|-----------------------------|------------------------|-----------------|-----------|
| DNA-Cu/AgNCs                                  | 20 min                      | 0.05-2 mU/mL           | 0.05 mU/mL      | 13        |
| FITC/BSA-AuNCs                                | 30 min                      | 0.8-12 mU/mL           | 0.4 mU/mL       | 14        |
| Ag@SiO <sub>2</sub> nanoparticles             | /                           | 0-5 mU/mL              | 0.05 mU/mL      | 15        |
| Carbon dots                                   | 10 min                      | 1-80 mU/mL             | /               | 16        |
| H <sub>39</sub> GFP fluorescent protein       | 30 min                      | 0.025-2 mU/mL          | 0.015 mU/mL     | 8         |
| Graphene quantum dots                         | 25 min                      | /                      | 2.3 mU          | 17        |
| AuNCs@11-MUA-Cu <sup>2+</sup>                 | 20 min                      | 0.05-2.5 mU/mL         | 0.05 mU/mL      | 18        |
| P, O-g-C <sub>3</sub> N <sub>4</sub> nanodots | 30 min                      | 0.01-3 mU/mL           | 0.01 mU/mL      | This work |

## References

1. M. Rong, L. Lin, X. Song, T. Zhao, Y. Zhong, J. Yan, Y. Wang and X. Chen, *Anal. Chem.*, 2015, 87, 1288-1296.
2. J. Ye, Y. Li, H. Xu, S. Ouyang, D. Lu, X. Wang and D. Wang, *J. Mater. Chem. A*, 2015, DOI: 10.1039/c5ta05128b.
3. A. Ananthanarayanan, X. W. Wang, P. Routh, B. Sana, S. Lim, D. H. Kim, K. H. Lim, J. Li and P. Chen, *Adv. Funct. Mater.*, 2014, 24, 3021-3026.
4. J. Tian, Q. Liu, A. M. Asiri, A. O. Al-Youbi and X. Sun, *Anal. Chem.*, 2013, 85, 5595-5599.
5. S. Zhang, J. Li, M. Zeng, J. Xu, X. Wang and W. Hu, *Nanoscale*, 2014, 6, 4157-4162.
6. L. H. Jin and C. S. Han, *Anal. Chem.*, 2014, 86, 7209-7213.
7. N. Zhang, Y. Si, Z. Sun, L. Chen, R. Li, Y. Qiao and H. Wang, *Anal. Chem.*, 2014, 86, 11714-11721.
8. C. Lei, Z. Wang, Z. Nie, H. Deng, H. Hu, Y. Huang and S. Yao, *Anal. Chem.*, 2015, 87, 1974-1980.
9. Q. Qu, A. Zhu, X. Shao, G. Shi and Y. Tian, *Chem Commun*, 2012, 48, 5473-5475.
10. M. Vedamalai, A. P. Periasamy, C. W. Wang, Y. T. Tseng, L. C. Ho, C. C. Shih and H. T. Chang, *Nanoscale*, 2014, 6, 13119-13125.
11. J. Liu, W. Zuo, W. Zhang, Z. Wang, Z. Yang and B. Wang, *Nanoscale*, 2014, 6, 11473-11478.
12. D. L. Ma, H. Z. He, D. S. Chan, C. Y. Wong and C. H. Leung, *PLoS one*, 2014, 9, e99930-e99937.
13. W. Li, Y. Hu, Y. Xia, Q. Shen, Z. Nie, Y. Huang and S. Yao, *Biosens. Bioelectron.*, 2013, 47, 345-349.
14. C. Y. Ke, Y. T. Wu and W. L. Tseng, *Biosens. Bioelectron.*, 2015, 69C, 46-53.
15. K. Ma, L. Lu, Z. Qi, J. Feng, C. Zhuo and Y. Zhang, *Biosens. Bioelectron.*, 2015, 68, 648-653.
16. X. Ren, J. Wei, J. Ren, L. Qiang, F. Tang and X. Meng, *Colloids Surf., B*, 2015, 125, 90-95.
17. T. He, L. Qi, J. Zhang, Y.-L. Huang and Z.-Q. Zhang, *Sens. Actuators, B*, 2015, 215, 24-29.
18. J. Sun and X. Yang, *Biosens. Bioelectron.*, 2015, 74, 177-182.
